# Supplementary material
Source: PubMed Central journal article supplement (PMC11028488)
Supplement: 262_2011_998_MOESM1_ESM.pdf [file 262_2011_998_MOESM1_ESM.pdf]

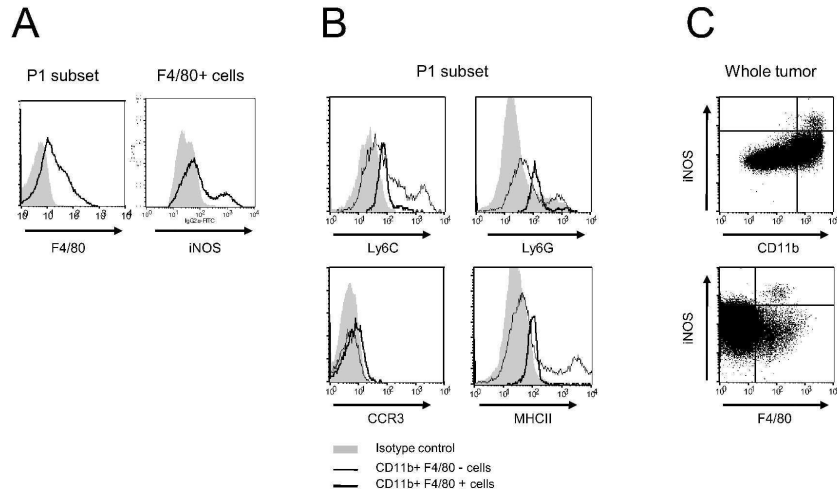

**Supplemental Figure 1.** *Panel A.* The isotype antibody staining (gray, filled-in peak) for F4/80 and iNOS are shown. *Panel B.* Analysis of CD11b+ Gr1<sup>lo</sup> cells (P1) for Ly6C, Ly6G, MHCII and CCR3 are shown. The staining patterns for both the F4/80- and F4/80+ subsets of P1 are provided. *Panel C.* Whole tumor single cell suspensions were analyzed for iNOS-expressing cells on day 2. Entire cell suspension was gated on and analyzed either for CD11b and iNOS or F4/80 and iNOS. A subset of CD11b+ cells expressed iNOS. All CD11b- cells (including tumor cells) were negative. In addition, only a subset of F4/80+ cells expressed iNOS. These data, in combination with those shown in Figures 1B and C, confirm that iNOS expression was unique to a subset of CD11b+ F4/80+Gr1<sup>lo</sup> cells.
